# Supplementary material for: LncRNA VPS9D1-AS1 Promotes Malignant Progression of Lung Adenocarcinoma by Targeting miRNA-30a-5p/KIF11 Axis
Source: Front Genet. 2022 Jan 24;12:807628. doi: 10.3389/fgene.2021.807628 (PMC8819668; doi:10.3389/fgene.2021.807628)
Supplement: Supplementary file 2 [file Table1.xlsx]

## Sheet: Sheet1
	log2FC	FDR
KIF11	2.71922	1.87113e-52
CELSR3	3.41506	3.9819e-47
MYBL2	3.84025	1.00808e-43
CCNE2	2.0611	9.69639e-32
CBX2	2.51923	1.86428e-24
SLC7A11	3.09093	1.95348e-22
GCLC	2.28393	2.42086e-17
LIN28B	7.75055	1.526e-12
FOXG1	5.11884	3.17125e-10
MKRN3	2.52593	2.01951e-08
FOXD1	2.27521	5.10183e-08
